# Supplementary material for: Bis(perylene diimide) with DACH bridge as non-fullerene electron acceptor for organic solar cells
Source: Royal Society of Chemistry journal article supplement (doi:10.1039/c5ra26777c), 2016-01-01
Supplement: c5ra26777c1.pdf [file c5ra26777c1.pdf]

Supporting Information for

**Bis(perylene diimide) with DACH bridge as non-  
fullerene electron acceptor for organic solar cells**

**Guangpeng Gao,<sup>ab</sup> Xiaolong Zhang,<sup>cdc</sup> Dong Meng,<sup>ab</sup> Andong Zhang,<sup>ab</sup> Yanxia Liu,<sup>e</sup> Wei  
Jiang,<sup>\*a</sup> Yanming Sun<sup>\*cd</sup> and Zhaohui Wang<sup>a</sup>**

- a. Beijing National Laboratory for Molecular Science, Key Laboratory of Organic Solids, Institute of Chemistry, Chinese Academy of Sciences, Beijing 100190, P. R. China
- b. University of Chinese Academy of Sciences, Beijing 100049, P. R. China
- c. Key Laboratory of Bio-Inspired Smart Interfacial Science and Technology of Ministry of Education, Beijing Key Laboratory of Bio-inspired Energy Materials and Devices, School of Chemistry and Environment, Beihang University, Beijing 100191, P. R. China
- d. Heeger Beijing Research and Development Center, International Research Institute for Multidisciplinary Science, Beihang University, Beijing 100191, P. R. China
- e. College of Physics, Liaoning University, No. 66 Chongshan Zhong Road, Huanggu District, Shenyang, P. R. China

E-mail: [jiangwei@iccas.ac.cn](mailto:jiangwei@iccas.ac.cn)

## Theoretical calculations

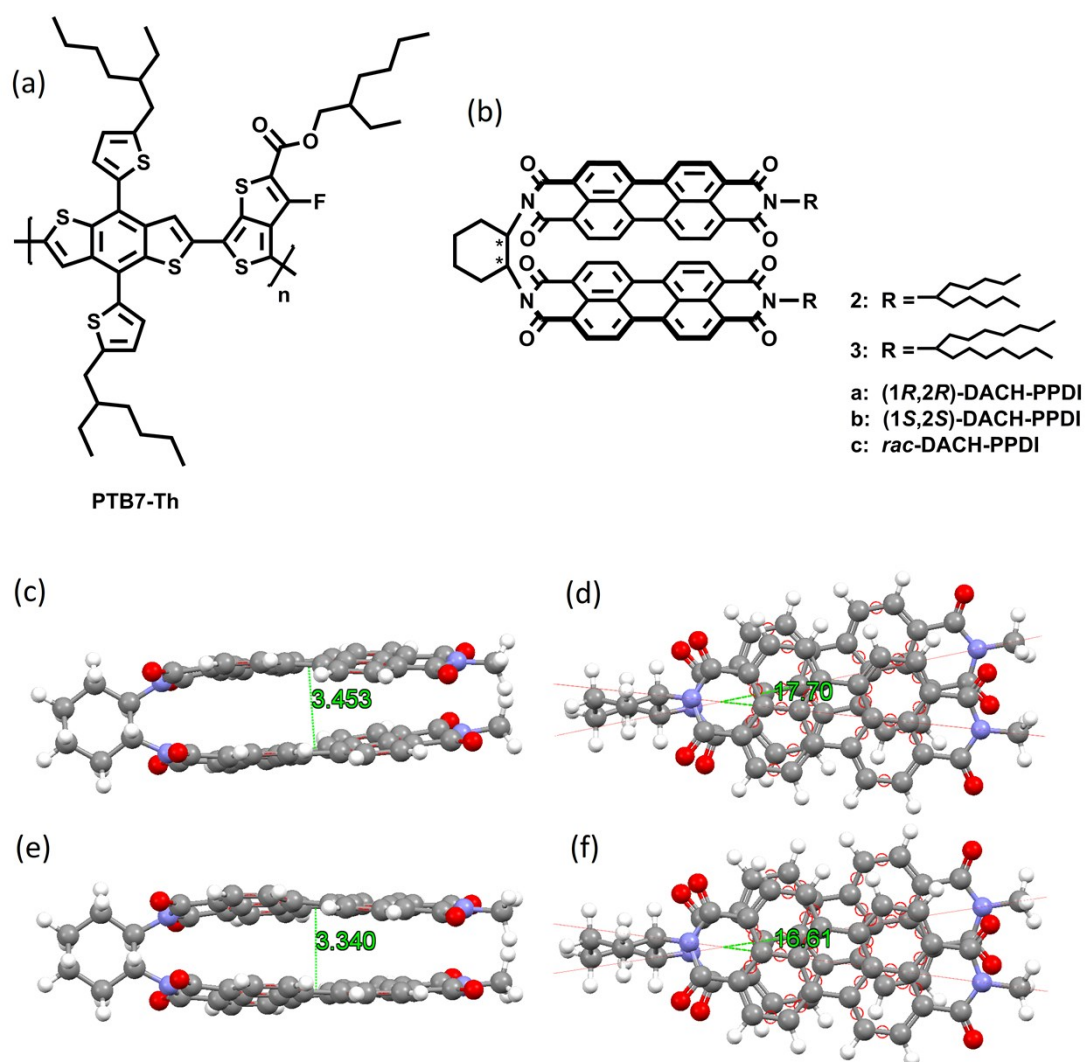

**Figure S1.** Chemical structures of PTB7-Th (a) and DACH-PPDIs (b). Optimized geometries of DACH-PPDI by DFT at the  $\omega$ B97XD/6-31G(d) level (c, d) and APFD/6-31G(d) level (e, f).<sup>1</sup>

## Optical, electrochemical and thermal Properties of DACH-PPDIs

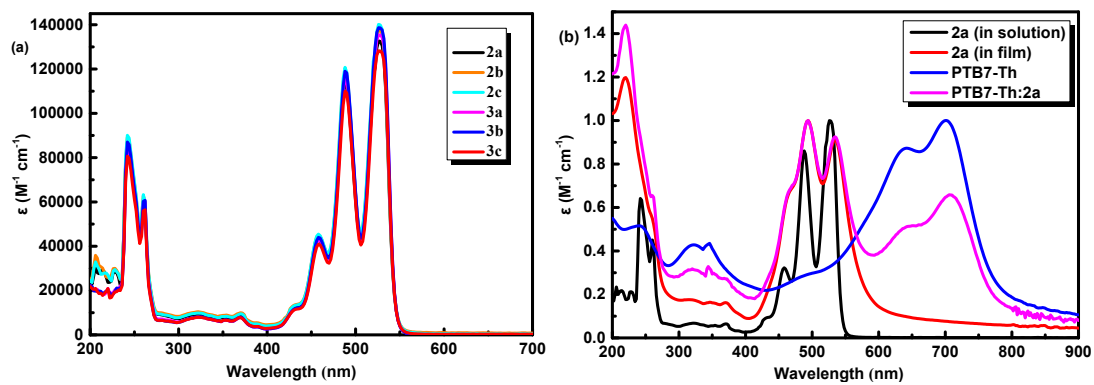

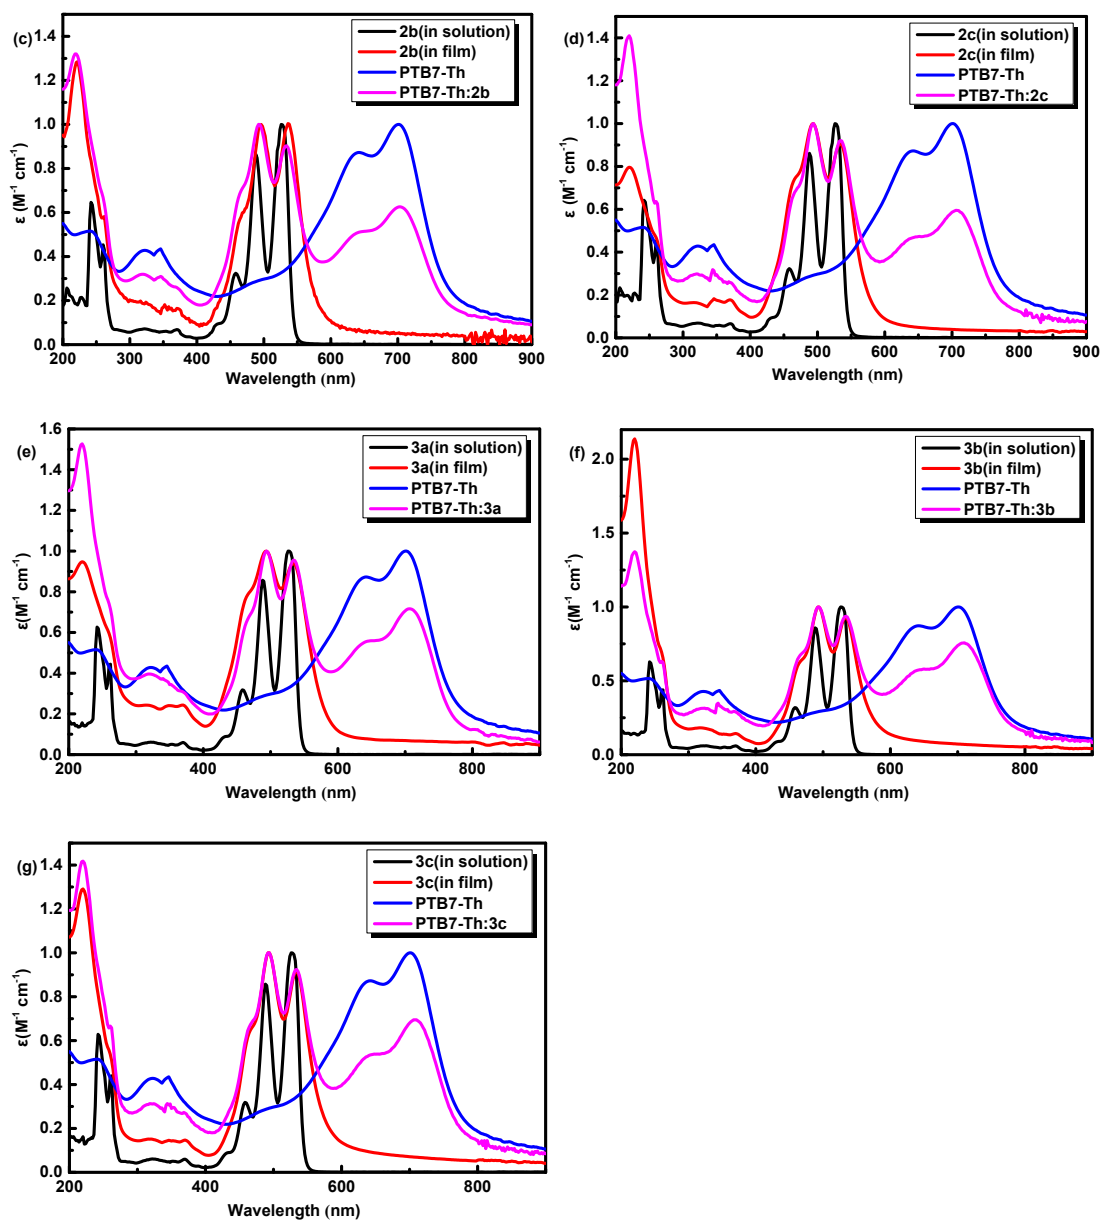

**Figure S2.** a) UV-Vis absorption spectra of **2** and **3** in chloroform solution ( $10^{-5}$  M). Normalized UV-Vis absorption spectra of b) **2a** in solution, **2a** and PTB7-Th in film on quartz substrate, PTB7-Th:**2a** blend film. c) **2b** in solution, **2b** and PTB7-Th in film on quartz substrate, PTB7-Th:**2b** blend film. d) **2c** in solution, **2c** and PTB7-Th in film on quartz substrate, PTB7-Th:**2c** blend film. e) **3a** in solution, **3a** and PTB7-Th in film on quartz substrate, PTB7-Th:**3a** blend film. f) **3b** in solution, **3b** and PTB7-Th in film on quartz substrate, PTB7-Th:**3b** blend film. g) **3c** in solution, **3c** and PTB7-Th in film on quartz substrate, PTB7-Th:**3c** blend film.

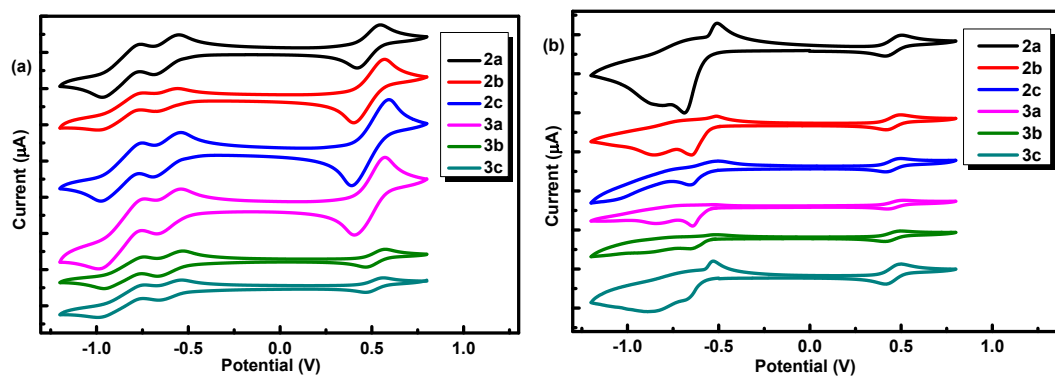

**Figure S3.** CVs of DACH-PPDIs in solution (a) and film (b). CVs were calibrated by the Fc/Fc<sup>+</sup> as the redox couple and oxidation were from the reference compound ferrocene.

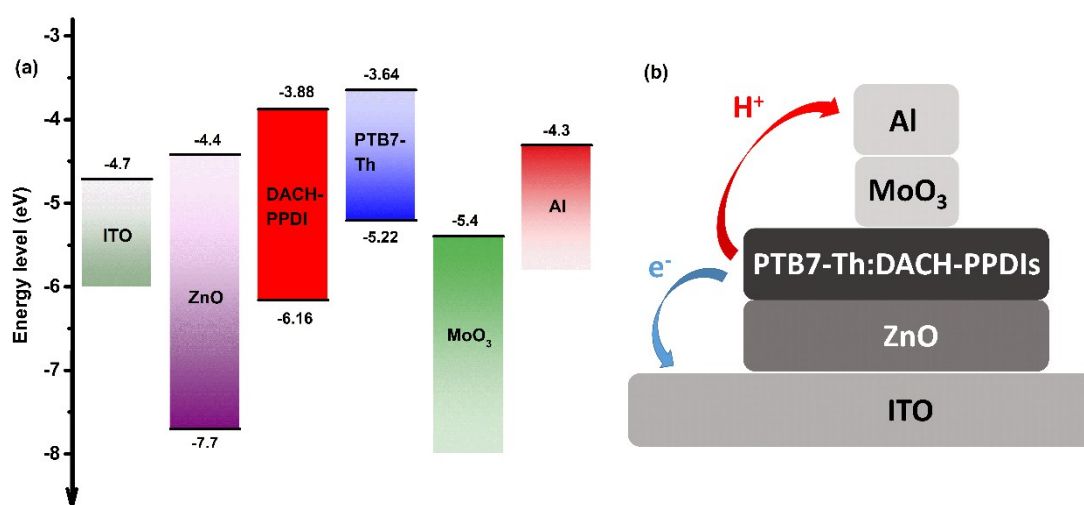

**Figure S4** a) Energy levels of ITO, ZnO, DACH-PPDIs, PTB7-Th, MoO<sub>3</sub>, and Al. b) The device architecture of non-fullerene OSCs.

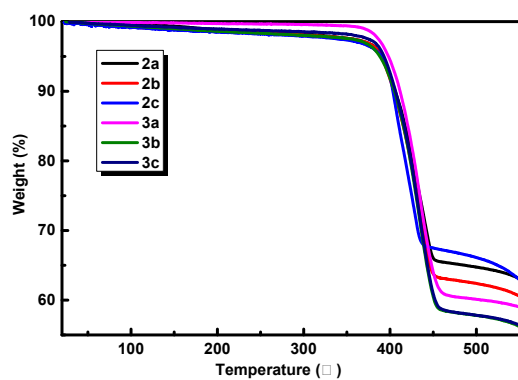

**Figure S5.** TGAs of DACH-PPDIs under nitrogen flow.

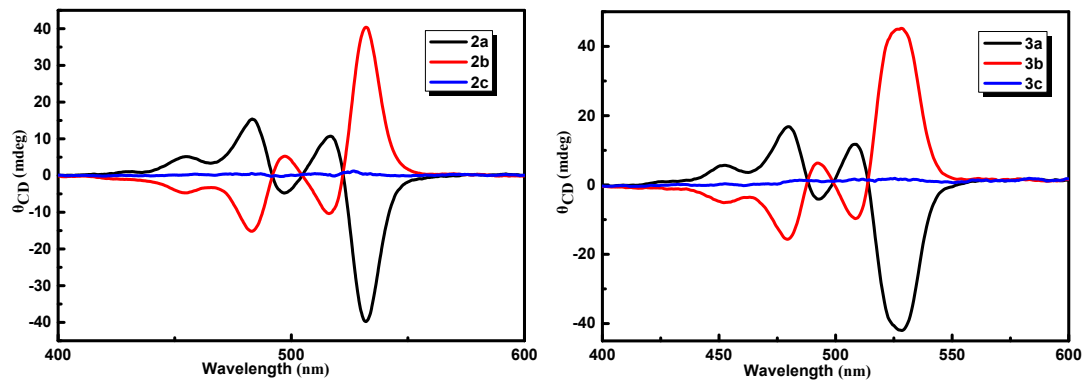

**Figure S6.** CD spectra of DACH-PPDIs in chloroform solution ( $10^{-5}$  M)

### Photovoltaic performances

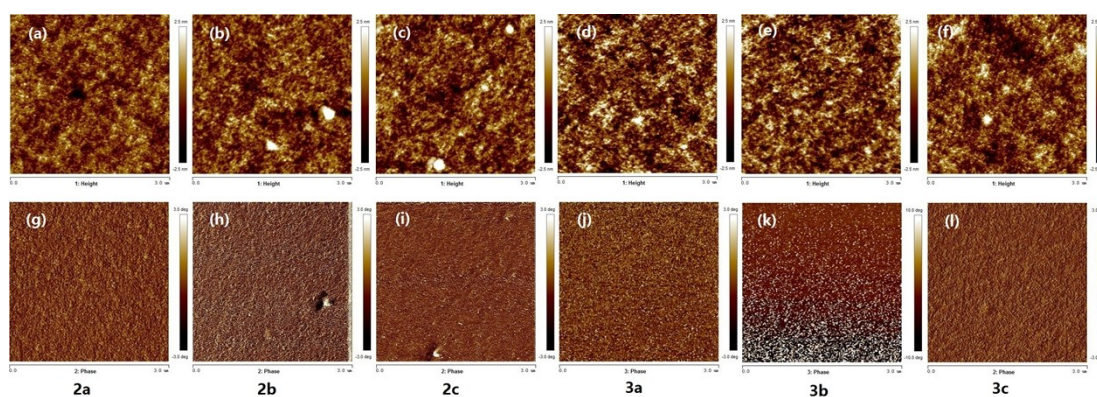

**Figure S7.** Tapping mode AFM height images (top) and phase images (bottom) of the active layers based on PTB7-Th:DACH-PPDIs, all images are  $3 \mu\text{m} \times 3 \mu\text{m}$

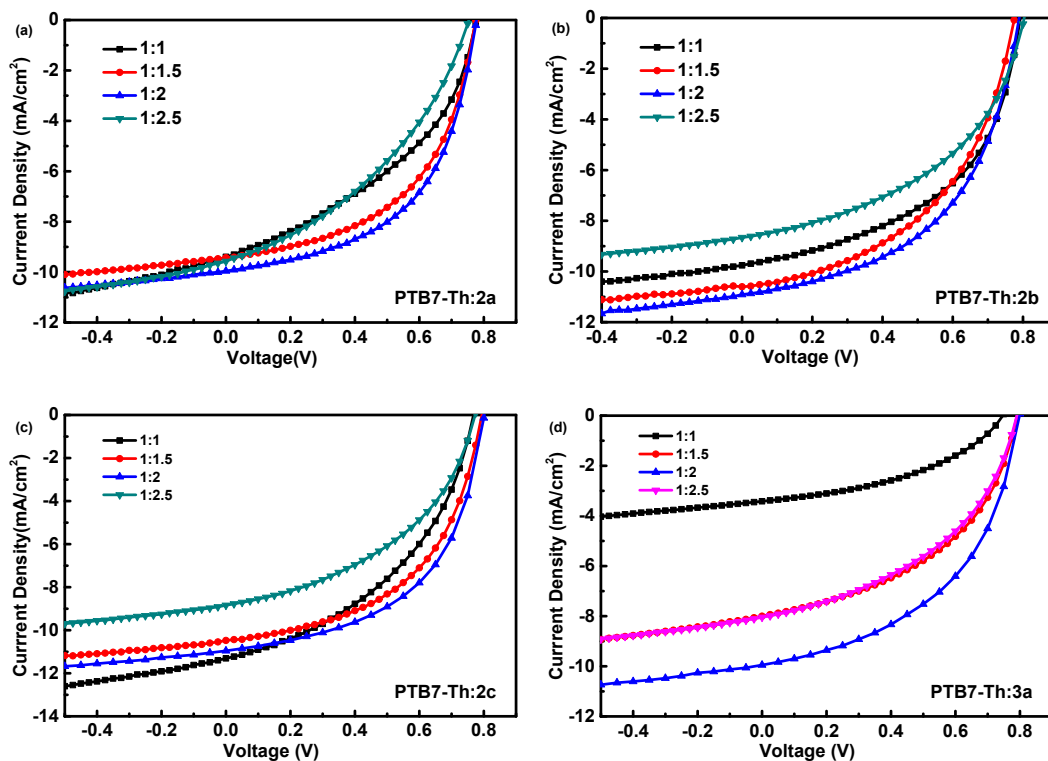

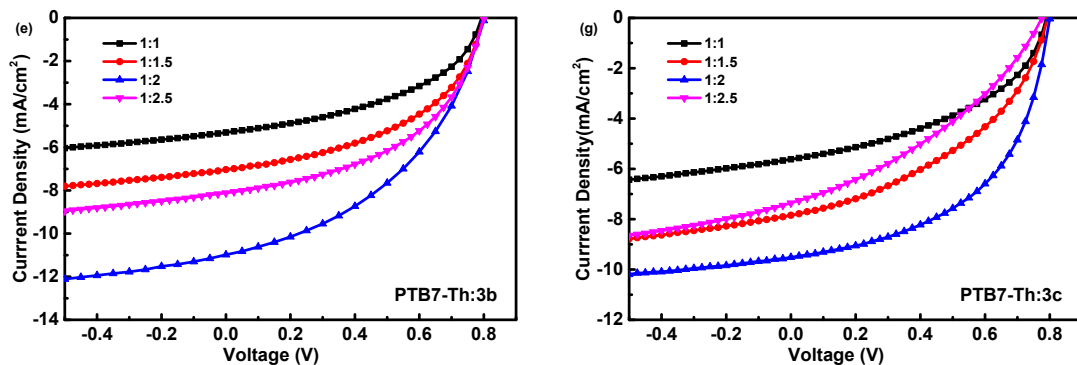

**Figure S8.**  $J$ - $V$  curves of non-fullerene OSCs based on PTB7-Th with **2** and **3** by different ratio

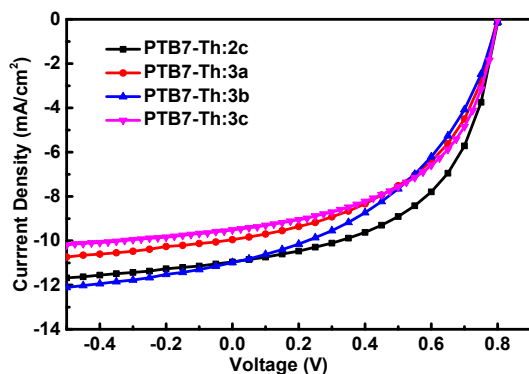

**Figure S9.**  $J$ - $V$  curves of non-fullerene OSCs based on PTB7-Th with **2c** and **3a-3c**, respectively. (1:2 ratio, w:w)

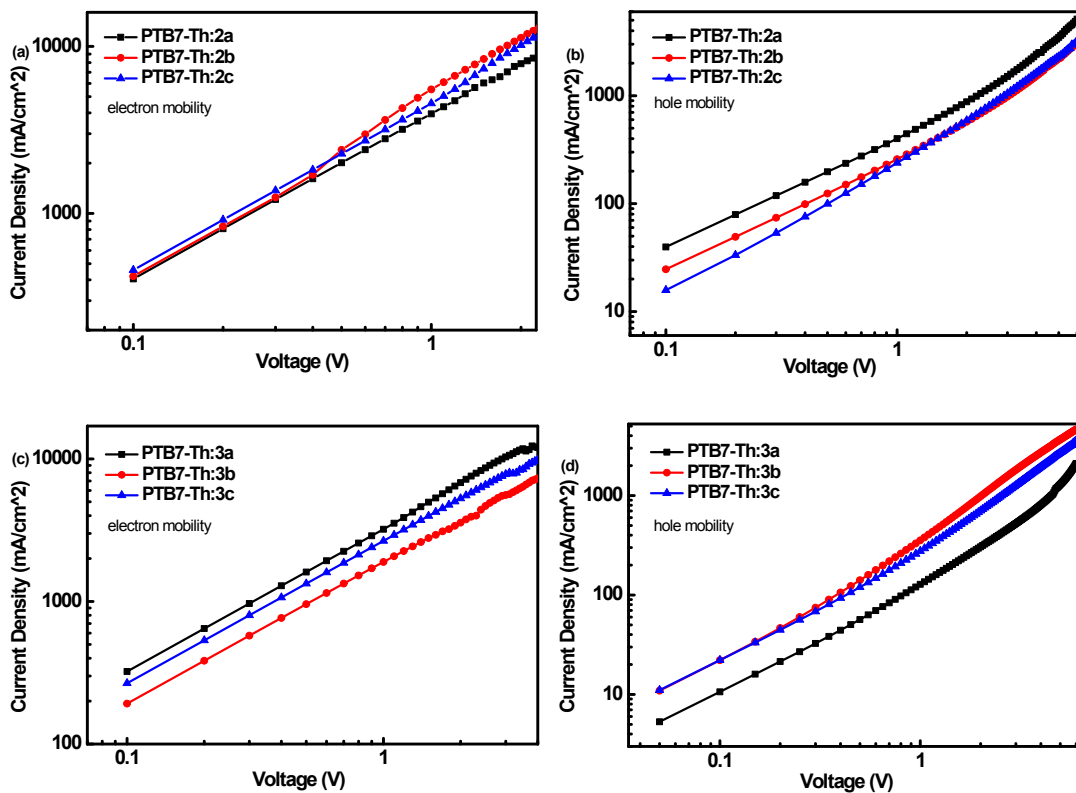

**Figure 10.** Measured space-charge-limited  $J$ - $V$  characteristics of PTB7-Th:DACH-PPDI blend films under dark conditions for electron-only devices and hole-only devices

**Table S1.** Photophysical, electrochemical and thermal properties of DACH-PPDIs

|           | $\lambda_{\max}^{\text{sol.}}$<br>[nm] <sup>a</sup> | $\epsilon$<br>[M <sup>-1</sup> cm <sup>-1</sup> ] <sup>a</sup> | $\lambda_{\max}^{\text{film}}$<br>[nm] <sup>b</sup> | $E_g$<br>[eV] <sup>c</sup> | $E_{\text{onset}}^{\text{re}}$<br>[V] <sup>d</sup> | $E_{\text{LUMO}}$<br>[eV] <sup>e</sup> | $E_{\text{HOMO}}$<br>[eV] <sup>f</sup> | $T_{\text{deg}}$<br>[°C] <sup>g</sup> |
|-----------|-----------------------------------------------------|----------------------------------------------------------------|-----------------------------------------------------|----------------------------|----------------------------------------------------|----------------------------------------|----------------------------------------|---------------------------------------|
| <b>2a</b> | <b>526</b>                                          | <b>132703</b>                                                  | <b>494</b>                                          | <b>2.28</b>                | <b>-0.92</b>                                       | <b>-3.88</b>                           | <b>-6.16</b>                           | <b>397</b>                            |
| <b>2b</b> | <b>526</b>                                          | <b>137768</b>                                                  | <b>496</b>                                          | <b>2.28</b>                | <b>-0.92</b>                                       | <b>-3.88</b>                           | <b>-6.16</b>                           | <b>398</b>                            |
| <b>2c</b> | <b>526</b>                                          | <b>140160</b>                                                  | <b>494</b>                                          | <b>2.28</b>                | <b>-0.92</b>                                       | <b>-3.88</b>                           | <b>-6.16</b>                           | <b>392</b>                            |
| <b>3a</b> | <b>526</b>                                          | <b>135399</b>                                                  | <b>494</b>                                          | <b>2.27</b>                | <b>-0.92</b>                                       | <b>-3.88</b>                           | <b>-6.15</b>                           | <b>401</b>                            |
| <b>3b</b> | <b>526</b>                                          | <b>138677</b>                                                  | <b>494</b>                                          | <b>2.27</b>                | <b>-0.92</b>                                       | <b>-3.88</b>                           | <b>-6.15</b>                           | <b>403</b>                            |
| <b>3c</b> | <b>526</b>                                          | <b>128232</b>                                                  | <b>492</b>                                          | <b>2.27</b>                | <b>-0.92</b>                                       | <b>-3.88</b>                           | <b>-6.15</b>                           | <b>401</b>                            |

<sup>a</sup> Measured in dilute CHCl<sub>3</sub> solution (1.0 × 10<sup>-5</sup> M). <sup>b</sup> Measured in spin-coating film from CHCl<sub>3</sub> solution. <sup>c</sup> Calculated by the onset of absorption in CHCl<sub>3</sub> solution according to  $E_g$  (eV) = (1240/ $\lambda_{\text{onset}}$ ). <sup>d</sup> In CH<sub>2</sub>Cl<sub>2</sub> solution vs. Fc/Fc<sup>+</sup>. <sup>e</sup> LUMO (eV) estimated by the onset of the reduction peaks and calculated according to  $E_{\text{LUMO}} = -(4.8 + E_{\text{onset}}^{\text{re}})$  eV. <sup>f</sup> HOMO (eV) calculated according to  $E_{\text{HOMO}} = (E_{\text{LUMO}} - E_g)$  eV. <sup>g</sup> Decomposition temperature determined by TGA corresponding to 5% weight loss at 10 °C/min under nitrogen flow.

**Table S2.** The performances of PTB7-Th:2c blend based devices (1:2, w/w) under different annealing temperature

| D/A ratio | Annealing temperature (°C) | $V_{\text{oc}}$ (V) | $J_{\text{sc}}$ (mA cm <sup>-2</sup> ) | FF (%)       | PCE (%) <sup>a</sup> |
|-----------|----------------------------|---------------------|----------------------------------------|--------------|----------------------|
| 1:2       | --                         | 0.79 ± 0.007        | 7.19 ± 0.19                            | 51.80 ± 1.67 | 2.95 ± 0.05 (3.00)   |
| 1:2       | 70                         | 0.80 ± 0.006        | 10.63 ± 0.39                           | 51.40 ± 1.56 | 4.34 ± 0.20 (4.68)   |
| 1:2       | 90                         | 0.77 ± 0.014        | 9.81 ± 0.46                            | 45.15 ± 0.94 | 3.40 ± 0.10 (3.48)   |

<sup>a</sup> Tested under the illumination of AM 1.5 G 100 mW/cm<sup>2</sup>. The values in parentheses refer to the max PCEs obtained from over five devices.

**Table S3.** The detailed photovoltaic values of the non-fullerene devices with an inverted structure based on PTB7-Th:DACH-PPDIs **2** and **3** by different ratios (w/w), under the annealing temperature of 70 °C

| D/A        | D/A ratio | $V_{\text{oc}}$ (V) | $J_{\text{sc}}$ (mA cm <sup>-2</sup> ) | FF (%)       | PCE (%) <sup>a</sup> |
|------------|-----------|---------------------|----------------------------------------|--------------|----------------------|
| PTB7-Th/2a | 1:1       | 0.76 ± 0.017        | 9.73 ± 0.24                            | 41.12 ± 1.47 | 3.05 ± 0.11 (3.25)   |
|            | 1:1.5     | 0.78 ± 0.014        | 9.63 ± 0.36                            | 49.48 ± 1.65 | 3.70 ± 0.10 (3.81)   |
|            | 1:2       | 0.77 ± 0.006        | 10.52 ± 0.37                           | 50.40 ± 1.63 | 4.09 ± 0.15 (4.36)   |

|            | 1:2.5     | 0.77 ± 0.007        | 8.54 ± 0.43                            | 44.28 ± 1.42 | 2.92 ± 0.11 (3.05) |
|------------|-----------|---------------------|----------------------------------------|--------------|--------------------|
| D/A        | D/A ratio | V <sub>oc</sub> (V) | J <sub>sc</sub> (mA cm <sup>-2</sup> ) | FF (%)       | PCE (%)            |
| PTB7-Th/2b | 1:1       | 0.78 ± 0.008        | 9.54 ± 0.34                            | 49.20 ± 2.00 | 3.66 ± 0.14 (3.91) |
|            | 1:1.5     | 0.78 ± 0.012        | 9.64 ± 0.49                            | 50.20 ± 1.25 | 3.79 ± 0.19 (4.01) |
|            | 1:2       | 0.79 ± 0.003        | 10.47 ± 0.34                           | 51.47 ± 0.56 | 4.25 ± 0.11 (4.42) |
|            | 1:2.5     | 0.79 ± 0.008        | 8.30 ± 0.19                            | 45.85 ± 1.26 | 3.00 ± 0.13 (3.24) |
| D/A        | D/A ratio | V <sub>oc</sub> (V) | J <sub>sc</sub> (mA cm <sup>-2</sup> ) | FF (%)       | PCE (%)            |
| PTB7-Th/2c | 1:1       | 0.77 ± 0.012        | 10.92 ± 0.43                           | 42.20 ± 1.30 | 3.54 ± 0.21 (3.81) |
|            | 1:1.5     | 0.79 ± 0.005        | 9.60 ± 0.51                            | 52.00 ± 1.07 | 3.95 ± 0.19 (4.29) |
|            | 1:2       | 0.80 ± 0.006        | 10.63 ± 0.39                           | 51.40 ± 1.56 | 4.34 ± 0.20 (4.68) |
|            | 1:2.5     | 0.77 ± 0.009        | 7.74 ± 0.30                            | 35.26 ± 1.56 | 2.10 ± 0.16 (2.38) |
| D/A        | D/A ratio | V <sub>oc</sub> (V) | J <sub>sc</sub> (mA cm <sup>-2</sup> ) | FF (%)       | PCE (%)            |
| PTB7-Th/3a | 1:1       | 0.67 ± 0.052        | 3.18 ± 0.38                            | 41.60 ± 0.92 | 0.89 ± 0.17 (1.09) |
|            | 1:1.5     | 0.79 ± 0.002        | 7.27 ± 0.61                            | 47.48 ± 1.92 | 2.73 ± 0.20 (2.95) |
|            | 1:2       | 0.79 ± 0.010        | 9.56 ± 0.33                            | 50.03 ± 1.12 | 3.78 ± 0.05 (3.87) |
|            | 1:2.5     | 0.79 ± 0.004        | 7.82 ± 0.25                            | 45.04 ± 1.49 | 2.79 ± 0.05 (2.84) |



| D/A        | D/A ratio | $V_{oc}$ (V) | $J_{sc}$ (mA cm <sup>-2</sup> ) | FF (%)       | PCE (%)            |
|------------|-----------|--------------|---------------------------------|--------------|--------------------|
| PTB7-Th/3b | 1:1       | 0.79 ± 0.005 | 5.04 ± 0.48                     | 45.06 ± 1.59 | 1.79 ± 0.12 (1.92) |
|            | 1:1.5     | 0.80 ± 0.008 | 6.53 ± 0.68                     | 46.20 ± 1.70 | 2.40 ± 0.23 (2.69) |
|            | 1:2       | 0.80 ± 0.006 | 9.51 ± 0.15                     | 49.78 ± 1.15 | 3.80 ± 0.06 (3.85) |
|            | 1:2.5     | 0.80 ± 0.007 | 7.37 ± 0.45                     | 51.44 ± 1.62 | 3.03 ± 0.09 (3.17) |

| D/A        | D/A ratio | $V_{oc}$ (V) | $J_{sc}$ (mA cm <sup>-2</sup> ) | FF (%)       | PCE (%)            |
|------------|-----------|--------------|---------------------------------|--------------|--------------------|
| PTB7-Th/3c | 1:1       | 0.78 ± 0.009 | 5.35 ± 0.22                     | 43.48 ± 1.78 | 1.81 ± 0.16 (1.97) |
|            | 1:1.5     | 0.79 ± 0.008 | 7.46 ± 0.31                     | 44.06 ± 1.31 | 2.59 ± 0.06 (2.66) |
|            | 1:2       | 0.81 ± 0.007 | 9.55 ± 0.23                     | 50.55 ± 1.47 | 3.90 ± 0.06 (3.97) |
|            | 1:2.5     | 0.79 ± 0.006 | 6.91 ± 0.55                     | 34.55 ± 0.97 | 1.87 ± 0.16 (2.07) |

<sup>a</sup> Tested under the illumination of AM 1.5 G 100 mW/cm<sup>2</sup>. The values in parentheses refer to the max PCEs obtained from over five devices.

## References:

- (a) J. -D. Chai and M. Head-Gordon, *Phys. Chem. Chem. Phys.*, 2008, **10**, 6615–6620; (b) A. Austin, G. A. Petersson, M. J. Frisch, F. J. Dobek, G. Scalmani, and K. Throssell, *J. Chem. Theory Comput.*, 2012, **8**, 4989–5007; (c) M. M. Francl, W. J. Pietro, W. J. Hehre, J. S. Binkley, M. S. Gordon, D. J. DeFrees and J. A. Pople, *J. Chem. Phys.*, 1982, **77**, 3654-3665; (d) Gaussian 09, Revision D.01, M. J. Frisch, G. W. Trucks, H. B. Schlegel, G. E. Scuseria, M. A. Robb, J. R. Cheeseman, G. Scalmani, V. Barone, B. Mennucci, G. A. Petersson, H. Nakatsuji, M. Caricato, X. Li, H. P. Hratchian, A. F. Izmaylov, J. Bloino, G. Zheng, J. L. Sonnenberg, M. Hada, M. Ehara, K. Toyota, R. Fukuda, J. Hasegawa, M. Ishida, T. Nakajima, Y. Honda, O. Kitao, H. Nakai, T. Vreven, J. A. Montgomery, Jr., J. E. Peralta, F. Ogliaro, M. Bearpark, J. J. Heyd, E. Brothers, K. N. Kudin, V. N. Staroverov, T. Keith, R. Kobayashi, J. Normand, K. Raghavachari, A. Rendell, J. C. Burant, S. S. Iyengar, J. Tomasi, M. Cossi, N. Rega, J. M. Millam, M. Klene, J. E. Knox, J. B. Cross, V. Bakken, C. Adamo, J. Jaramillo, R. Gomperts, R. E. Stratmann, O. Yazyev, A. J. Austin, R. Cammi, C. Pomelli, J. W. Ochterski, R. L. Martin, K. Morokuma, V. G. Zakrzewski, G. A. Voth, P. Salvador, J. J. Dannenberg, S. Dapprich, A. D. Daniels, O. Farkas, J. B. Foresman, J. V. Ortiz, J. Cioslowski, and D. J. Fox, Gaussian, Inc., Wallingford CT, 2013.

$^1\text{H}$  NMR spectrum of **2a** in  $\text{CDCl}_3$  (400 MHz, 25  $^\circ\text{C}$ ).

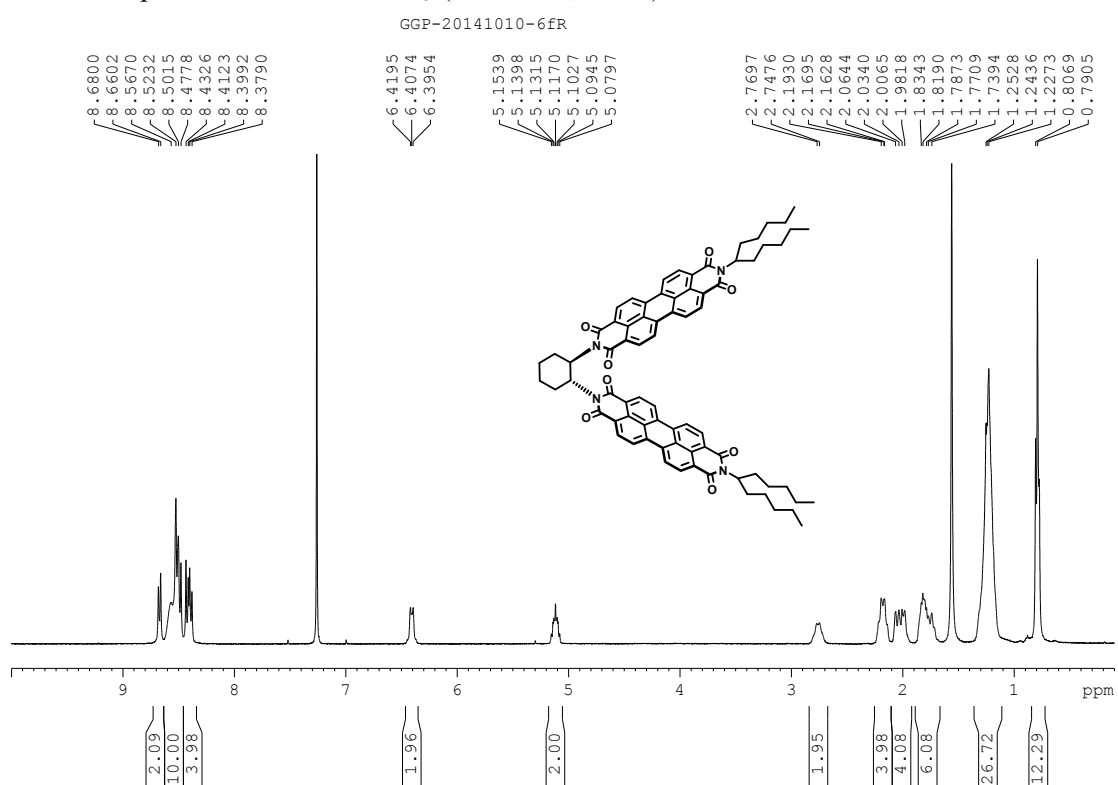

$^1\text{H}$  NMR spectrum of **2b** in  $\text{CDCl}_3$  (400 MHz, 25  $^\circ\text{C}$ ).

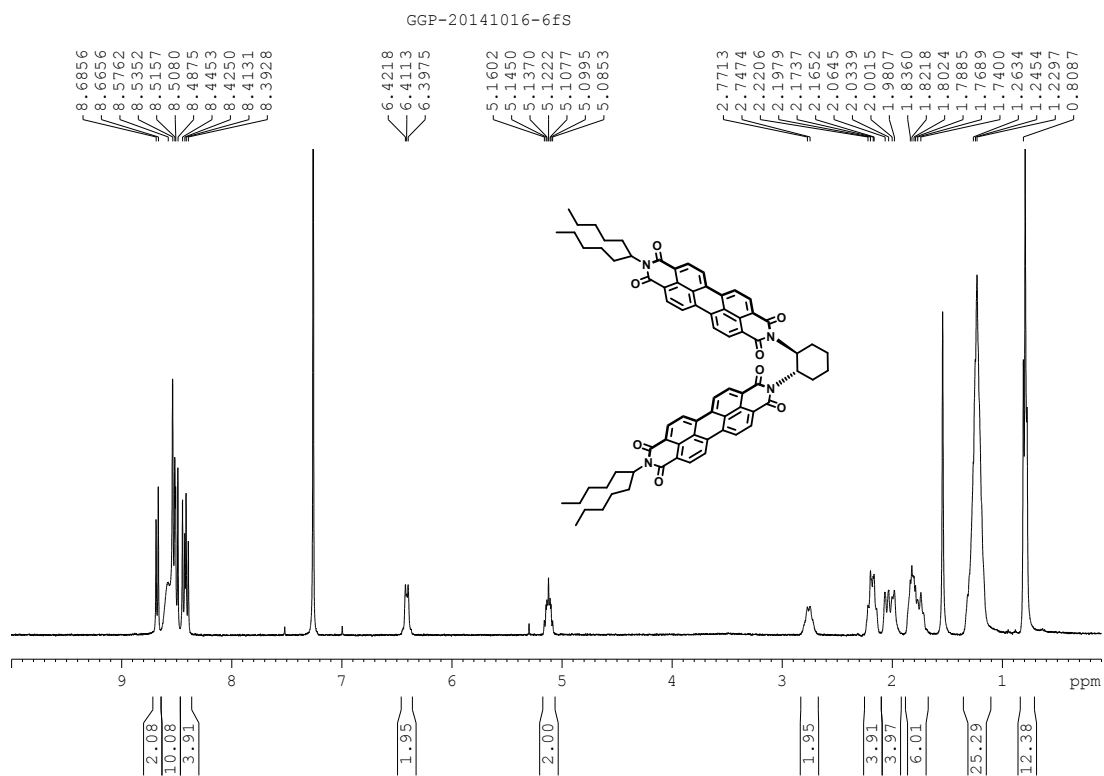

$^1\text{H}$  NMR spectrum of **2c** in  $\text{CDCl}_3$  (400 MHz, 25 °C).

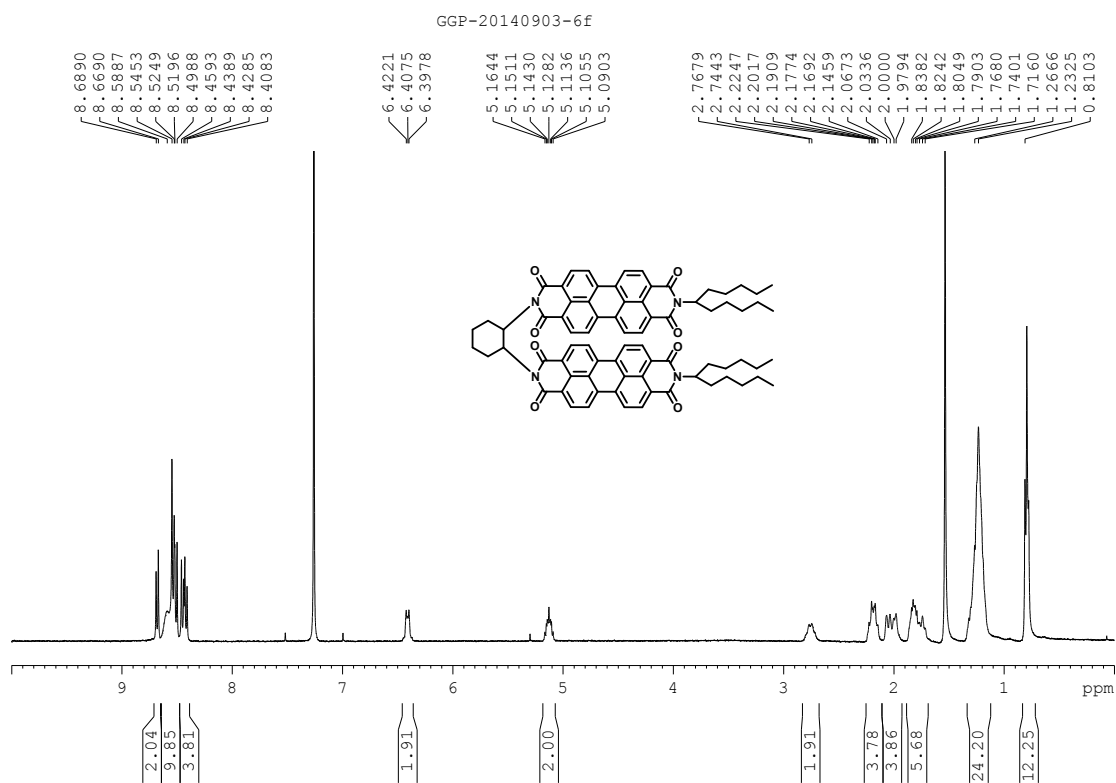

$^1\text{H}$  NMR spectrum of **3a** in  $\text{CDCl}_3$  (400 MHz, 25 °C).

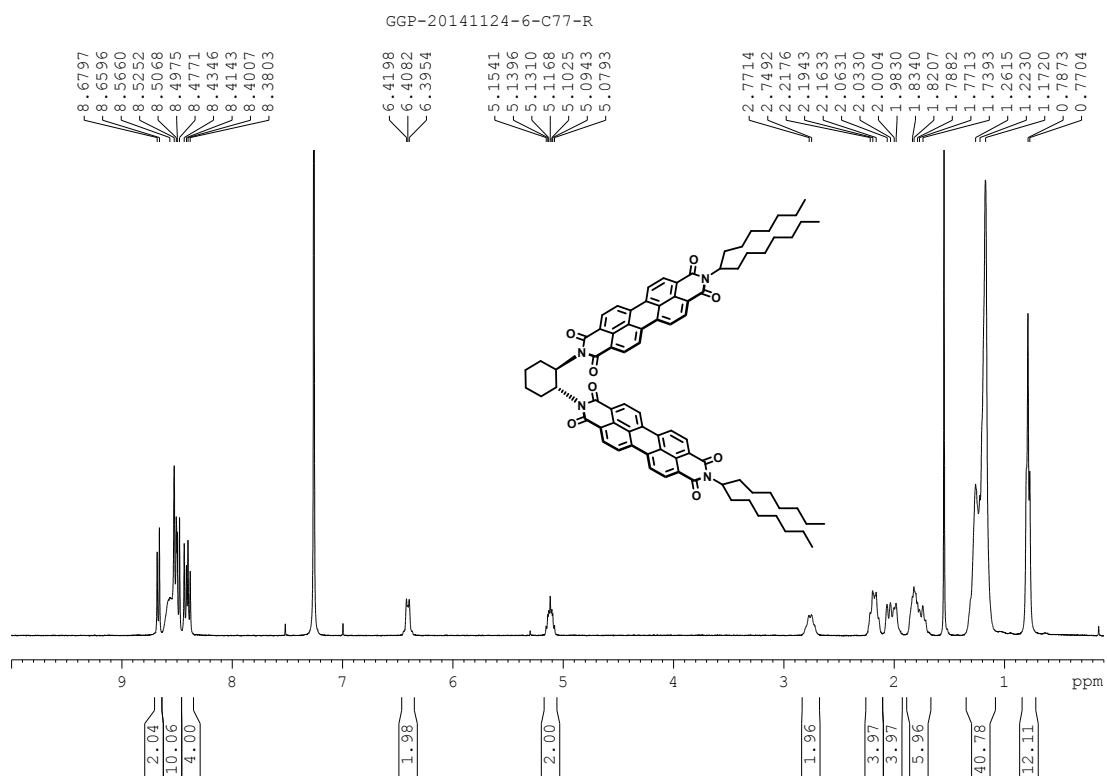

<sup>1</sup>H NMR spectrum of **3b** in CDCl<sub>3</sub> (400 MHz, 25 °C).

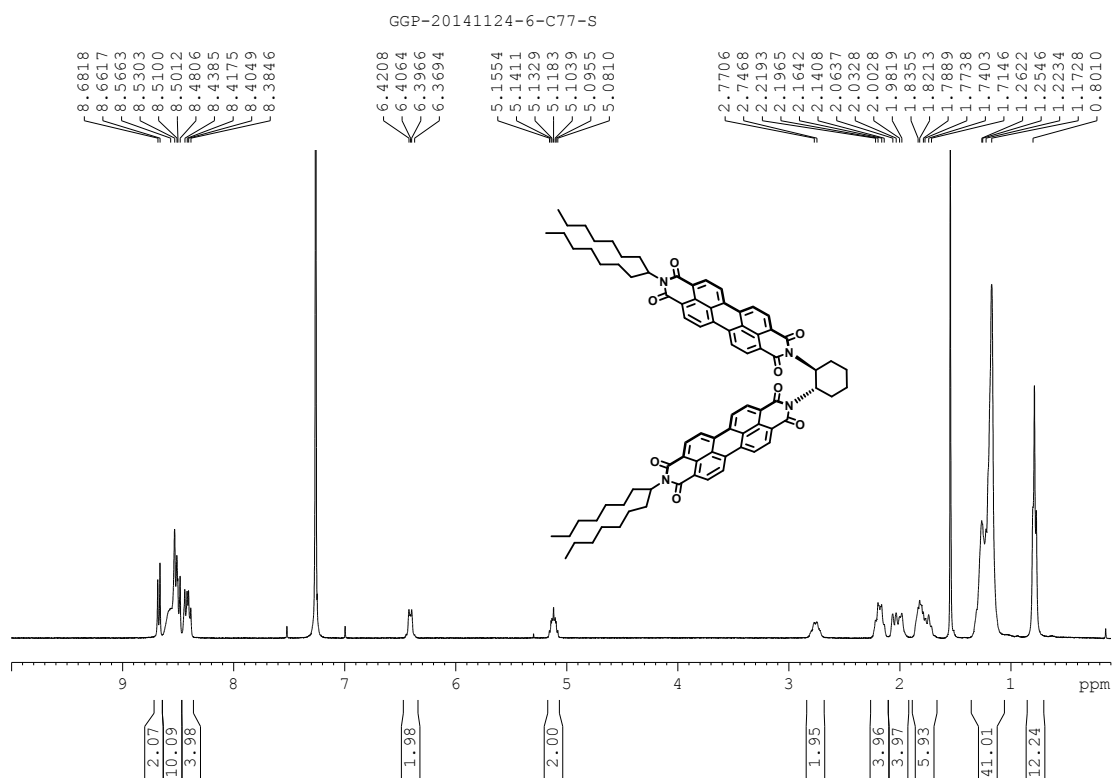

<sup>1</sup>H NMR spectrum of **3c** in CDCl<sub>3</sub> (400 MHz, 25 °C).

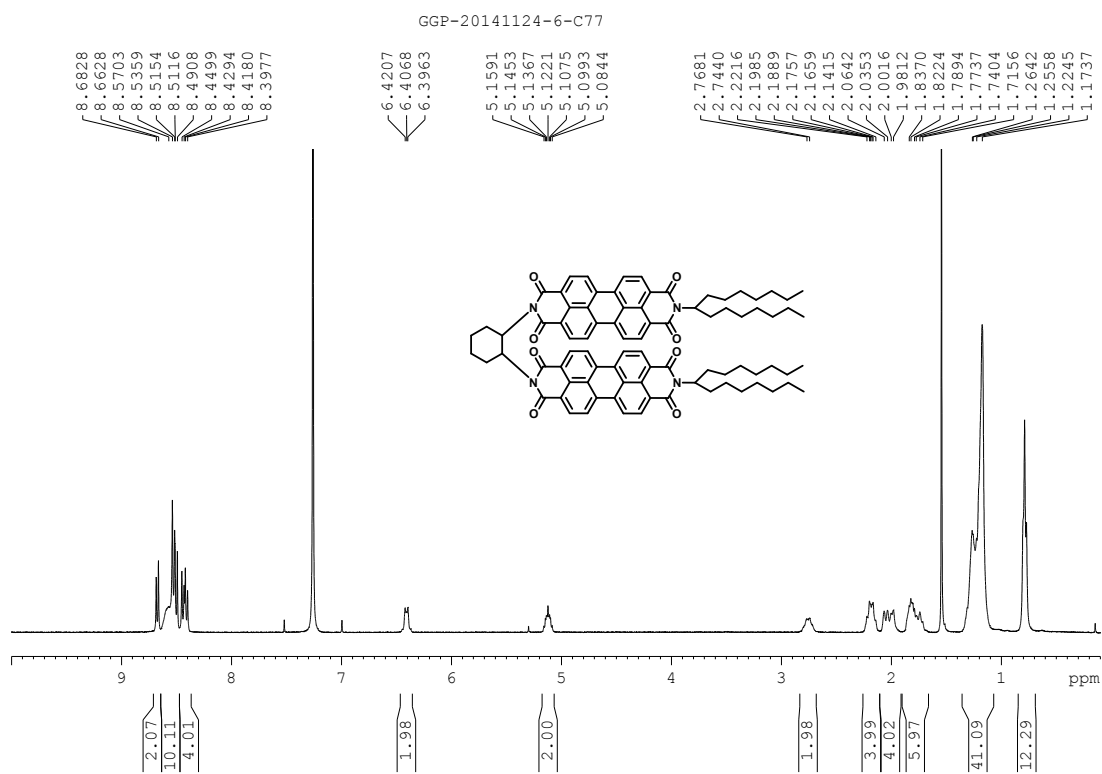

$^{13}\text{C}$  NMR spectrum of **2a** in  $\text{CDCl}_3$  (100 MHz, 25 °C).

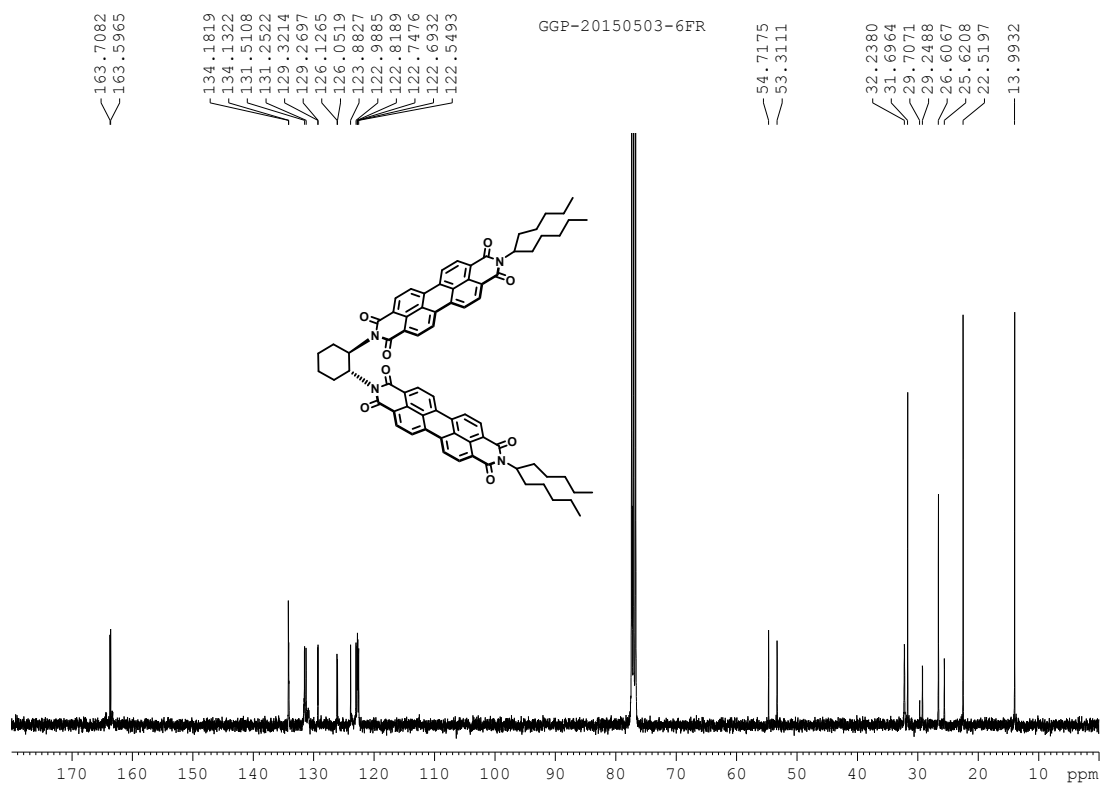

$^{13}\text{C}$  NMR spectrum of **2b** in  $\text{CDCl}_3$  (100 MHz, 25 °C).

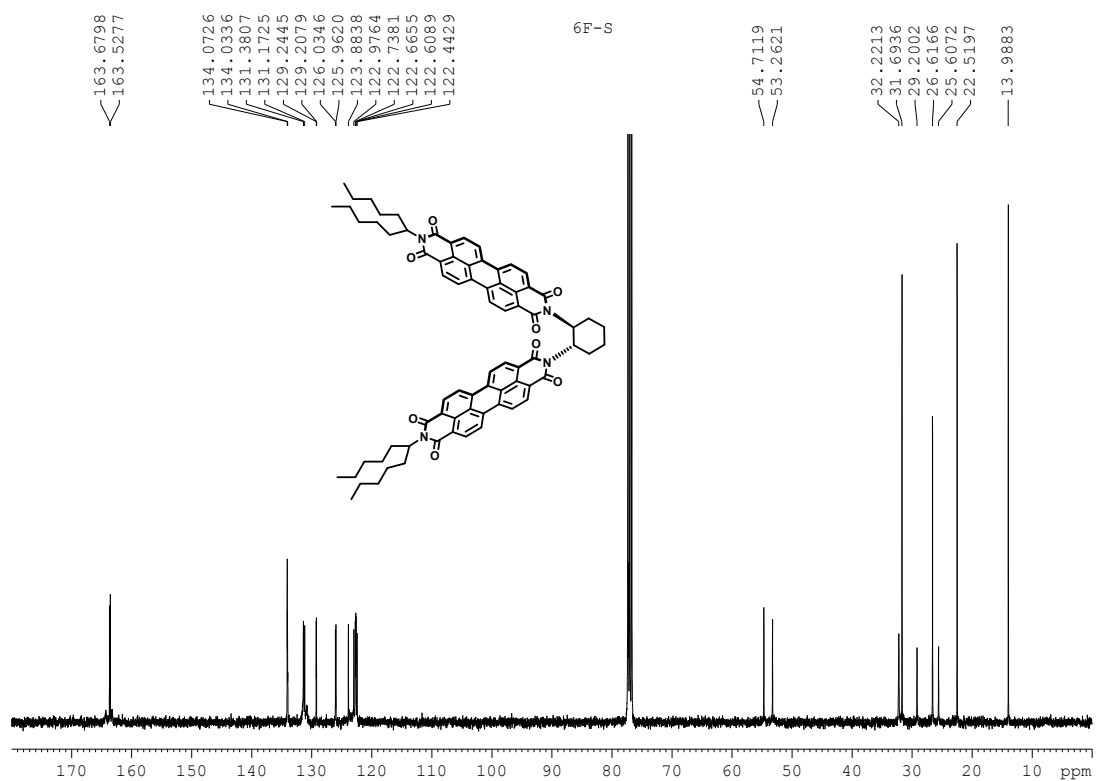

<sup>13</sup>C NMR spectrum of **2c** in CDCl<sub>3</sub> (100 MHz, 25 °C).

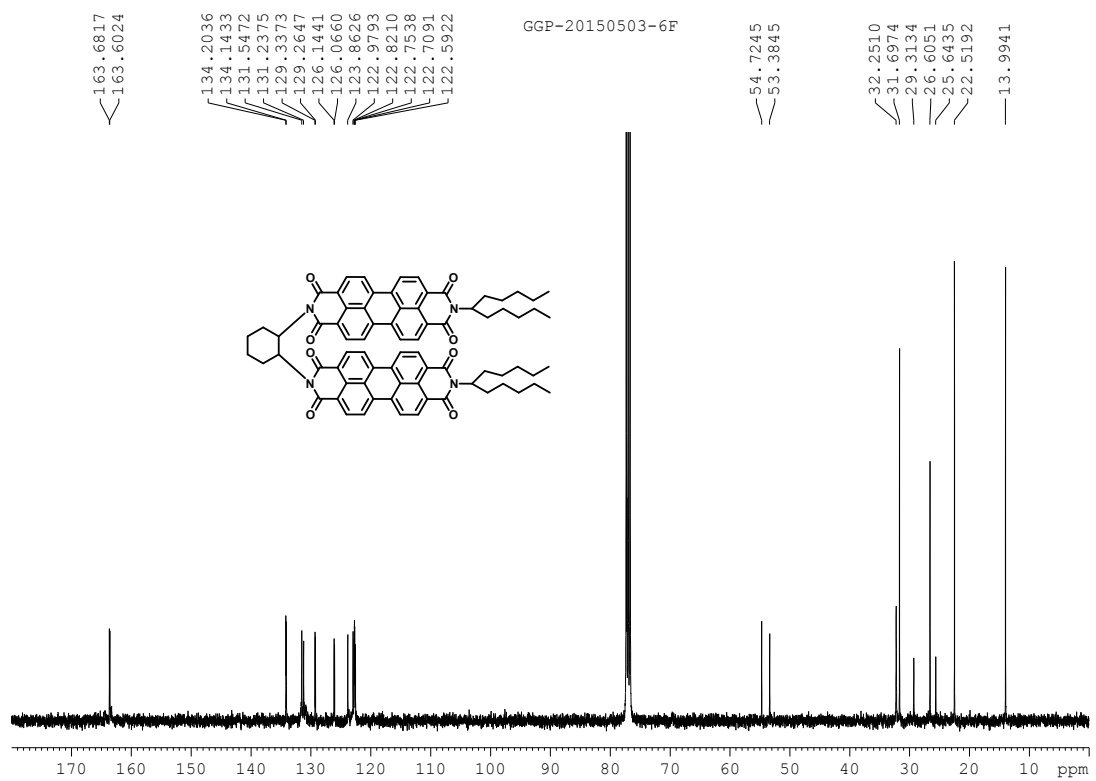

<sup>13</sup>C NMR spectrum of **3a** in CDCl<sub>3</sub> (100 MHz, 25 °C).

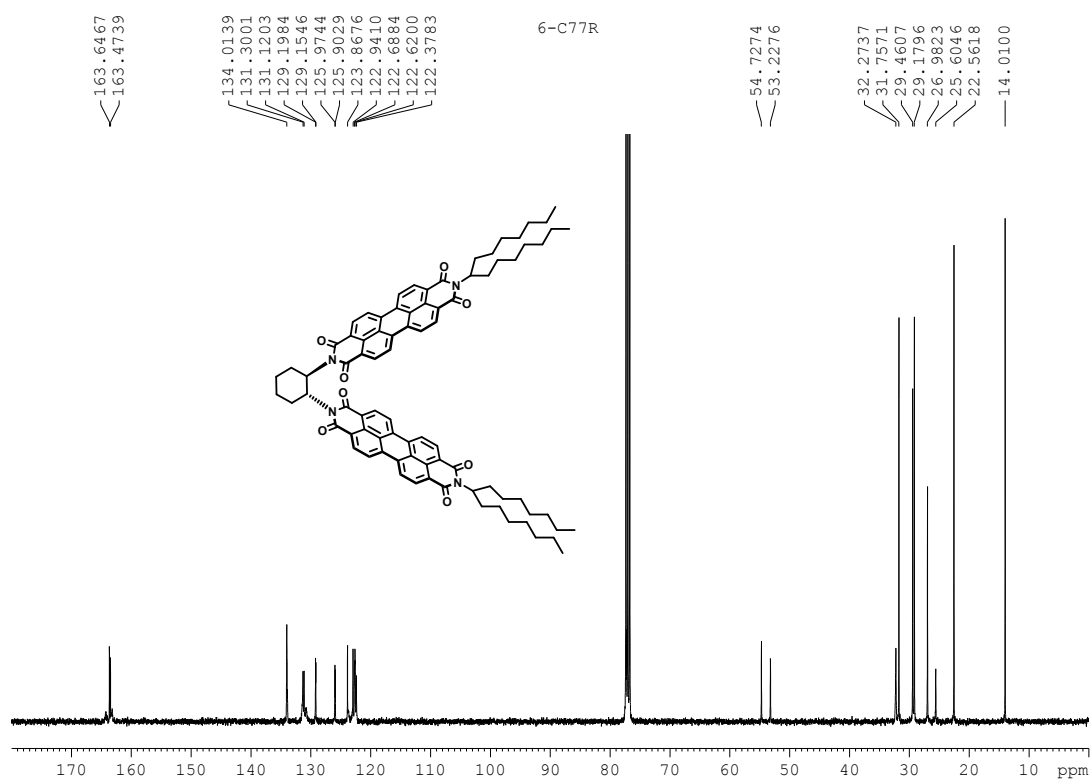

$^{13}\text{C}$  NMR spectrum of **3b** in  $\text{CDCl}_3$  (100 MHz, 25 °C).

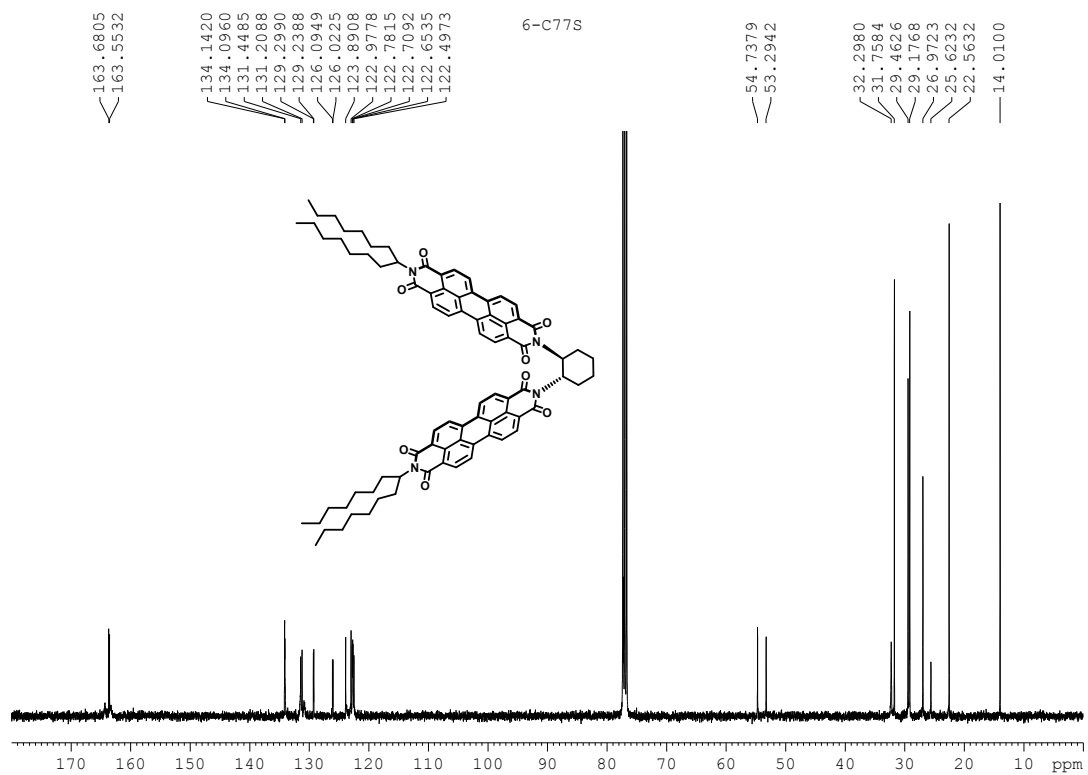

$^{13}\text{C}$  NMR spectrum of **3c** in  $\text{CDCl}_3$  (100 MHz, 25 °C).

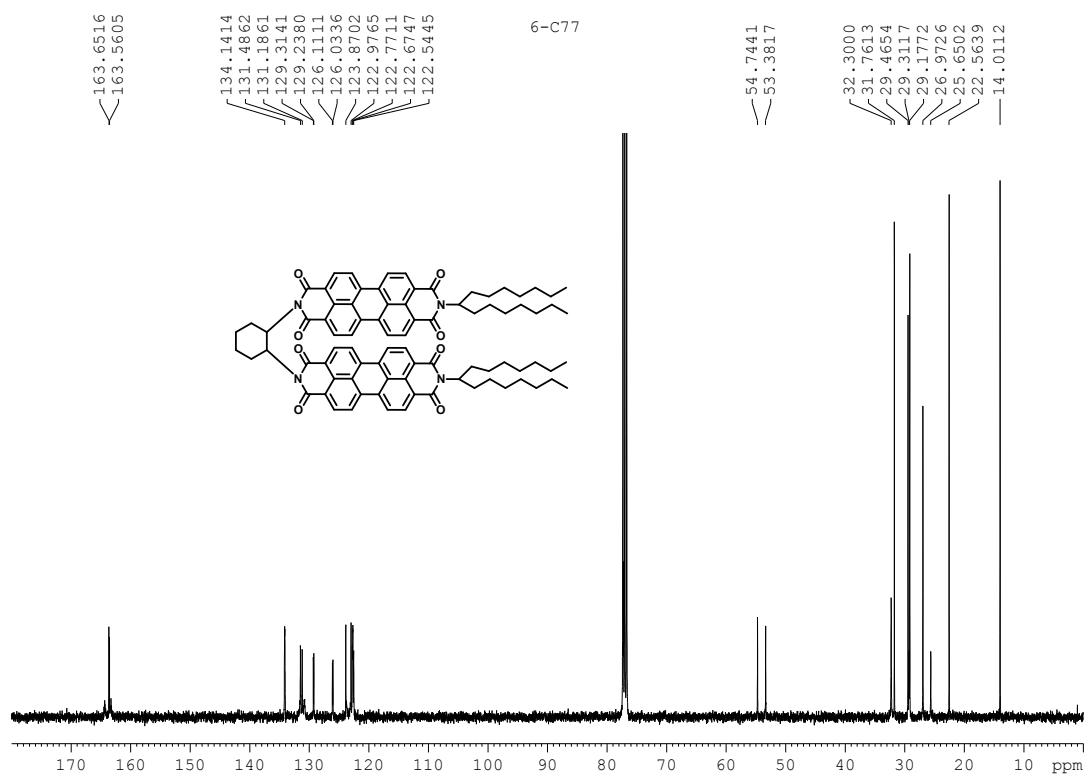

HRMS spectrum of **2a**.



# MALDI(N),6fr,20141121

## Analysis Info

Analysis Name D:\Data\MALDI\2014\1121\6fr\_0\_L9\_000001.d  
 Method MALDI\_P\_100-3000  
 Sample Name  
 Comment

Acquisition Date 11/21/2014 6:38:02 PM

Operator  
 Instrument solariX

## Acquisition Parameter

|                       |            |                      |           |                       |                          |
|-----------------------|------------|----------------------|-----------|-----------------------|--------------------------|
| Acquisition Mode      | Single MS  | Acquired Scans       | 6         | Calibration Date      | Fri Nov 21 06:21:04 2014 |
| Polarity              | Negative   | No. of Cell Fills    | 1         | Data Acquisition Size | 1048576                  |
| Broadband Low Mass    | 404.2 m/z  | No. of Laser Shots   | 10        | Data Processing Size  | 2097152                  |
| Broadband High Mass   | 2000.0 m/z | Laser Power          | 18.0 lp   | Apodization           | Sine-Bell Multiplication |
| Source Accumulation   | 0.001 sec  | Laser Shot Frequency | 0.020 sec |                       |                          |
| Ion Accumulation Time | 0.300 sec  |                      |           |                       |                          |

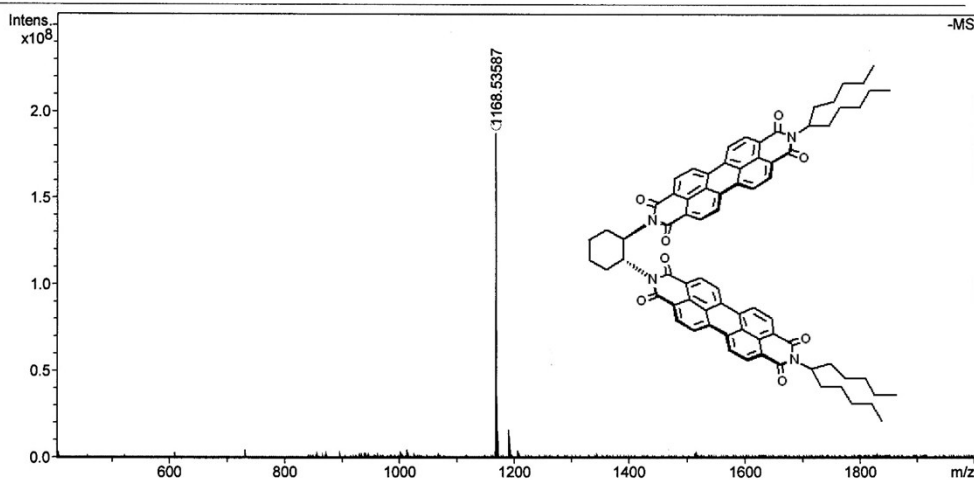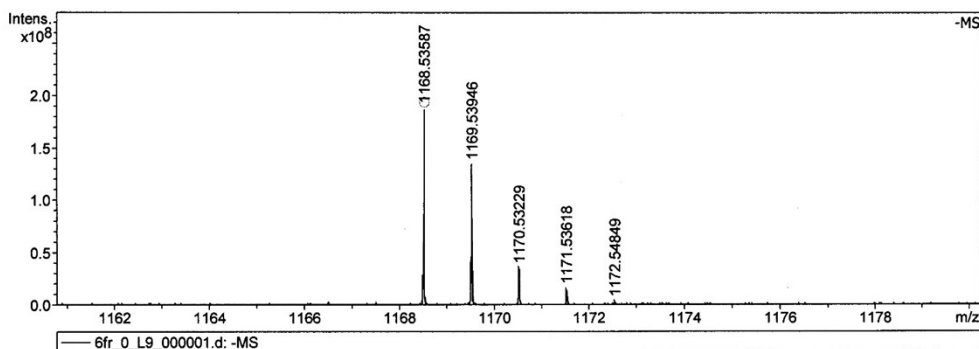

| Meas. m/z   | # | Ion Formula | Score  | m/z         | err [ppm] | Mean err [ppm] | mSigma | rdb  | e <sup>-</sup> Conf | N-Rule |
|-------------|---|-------------|--------|-------------|-----------|----------------|--------|------|---------------------|--------|
| 1168.535875 | 1 | C76H72N4O8  | 100.00 | 1168.535564 | -0.3      | -0.4           | 167.6  | 43.0 | odd                 | ok     |

HRMS spectrum of **2b**.

# MALDI(N),6fs,20141121

## Analysis Info

Analysis Name D:\Data\MALDI\2014\1121\6fs\_0\_L11\_000003.d  
 Method MALDI\_P\_100-3000  
 Sample Name  
 Comment

Acquisition Date 11/21/2014 6:42:06 PM

Operator  
 Instrument solariX

## Acquisition Parameter

|                       |            |                      |           |                       |                          |
|-----------------------|------------|----------------------|-----------|-----------------------|--------------------------|
| Acquisition Mode      | Single MS  | Acquired Scans       | 6         | Calibration Date      | Fri Nov 21 06:21:04 2014 |
| Polarity              | Negative   | No. of Cell Fills    | 1         | Data Acquisition Size | 1048576                  |
| Broadband Low Mass    | 404.2 m/z  | No. of Laser Shots   | 10        | Data Processing Size  | 2097152                  |
| Broadband High Mass   | 2000.0 m/z | Laser Power          | 18.0 lp   | Apodization           | Sine-Bell Multiplication |
| Source Accumulation   | 0.001 sec  | Laser Shot Frequency | 0.020 sec |                       |                          |
| Ion Accumulation Time | 0.300 sec  |                      |           |                       |                          |

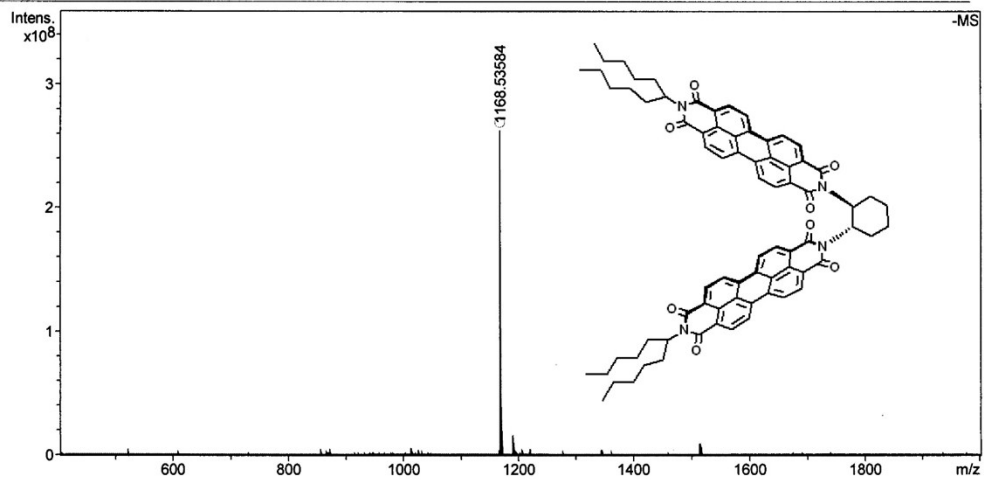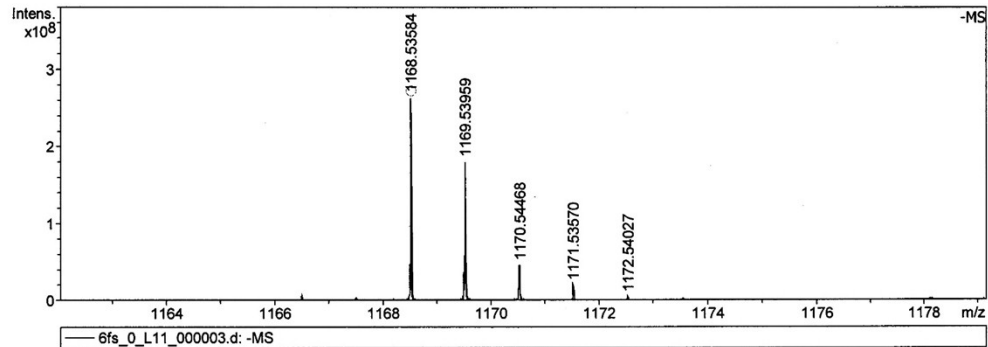

| Meas. m/z   | # | Ion Formula | Score  | m/z         | err [ppm] | Mean err [ppm] | mSigma | rdb  | e <sup>-</sup> Conf | N-Rule |
|-------------|---|-------------|--------|-------------|-----------|----------------|--------|------|---------------------|--------|
| 1168.535841 | 1 | C76H72N4O8  | 100.00 | 1168.535564 | -0.2      | -0.6           | 114.7  | 43.0 | odd                 | ok     |

HRMS spectrum of 2c.

# MALDI(N),6f,20141121

## Analysis Info

Analysis Name D:\Data\MALDI\2014\1121\6f\_0\_L7\_000002.d  
Method MALDI\_P\_100-3000  
Sample Name  
Comment

Acquisition Date 11/21/2014 6:35:48 PM

Operator  
Instrument solariX

## Acquisition Parameter

|                       |            |                      |           |                       |                          |
|-----------------------|------------|----------------------|-----------|-----------------------|--------------------------|
| Acquisition Mode      | Single MS  | Acquired Scans       | 6         | Calibration Date      | Fri Nov 21 06:21:04 2014 |
| Polarity              | Negative   | No. of Cell Fills    | 1         | Data Acquisition Size | 1048576                  |
| Broadband Low Mass    | 404.2 m/z  | No. of Laser Shots   | 10        | Data Processing Size  | 2097152                  |
| Broadband High Mass   | 2000.0 m/z | Laser Power          | 18.0 lp   | Apodization           | Sine-Bell Multiplication |
| Source Accumulation   | 0.001 sec  | Laser Shot Frequency | 0.020 sec |                       |                          |
| Ion Accumulation Time | 0.300 sec  |                      |           |                       |                          |

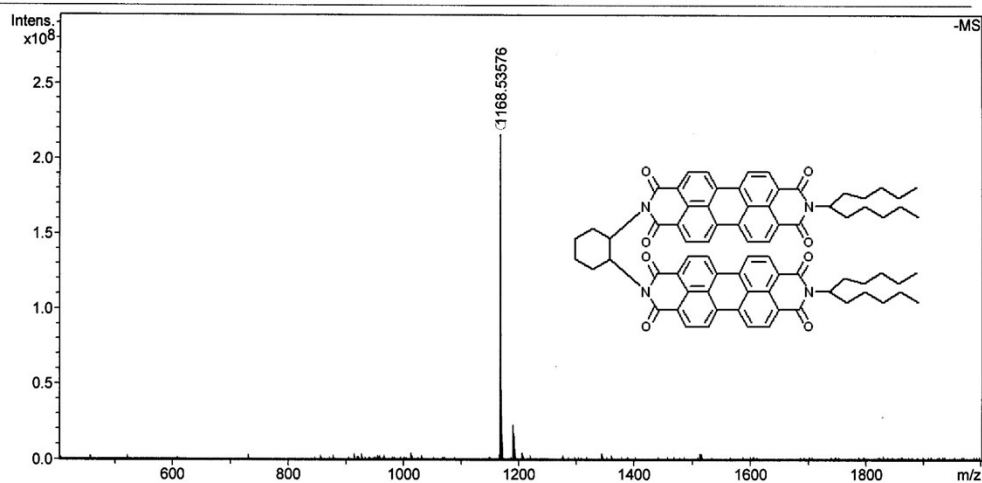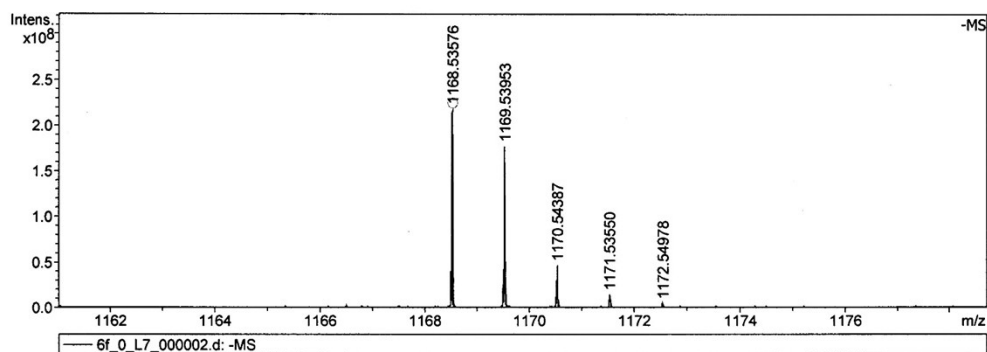

| Meas. m/z   | # | Ion Formula | Score  | m/z         | err [ppm] | Mean err [ppm] | mSigma | rdb  | e <sup>-</sup> Conf | N-Rule |
|-------------|---|-------------|--------|-------------|-----------|----------------|--------|------|---------------------|--------|
| 1168.535758 | 1 | C76H72N4O8  | 100.00 | 1168.535564 | -0.2      | -0.5           | 80.8   | 43.0 | odd                 | ok     |

HRMS spectrum of **3a**.

## MALDI(N),6-C7R,20150819

### Analysis Info

Analysis Name D:\Data\MALDI\2015\0819\6-C7R\_0\_G6\_000001.d  
Method MALDI\_N\_100-900  
Sample Name  
Comment

Acquisition Date 8/19/2015 3:52:45 PM

Operator  
Instrument solariX

### Acquisition Parameter

|                       |            |                      |           |                       |                          |
|-----------------------|------------|----------------------|-----------|-----------------------|--------------------------|
| Acquisition Mode      | Single MS  | Acquired Scans       | 5         | Calibration Date      | Wed Aug 19 03:46:07      |
| Polarity              | Negative   | No. of Cell Fills    | 1         | Data Acquisition Size | 2048576                  |
| Broadband Low Mass    | 202.1 m/z  | No. of Laser Shots   | 10        | Data Processing Size  | 2097152                  |
| Broadband High Mass   | 2500.0 m/z | Laser Power          | 24.6 lp   | Apodization           | Sine-Bell Multiplication |
| Source Accumulation   | 0.001 sec  | Laser Shot Frequency | 0.020 sec |                       |                          |
| Ion Accumulation Time | 0.300 sec  |                      |           |                       |                          |

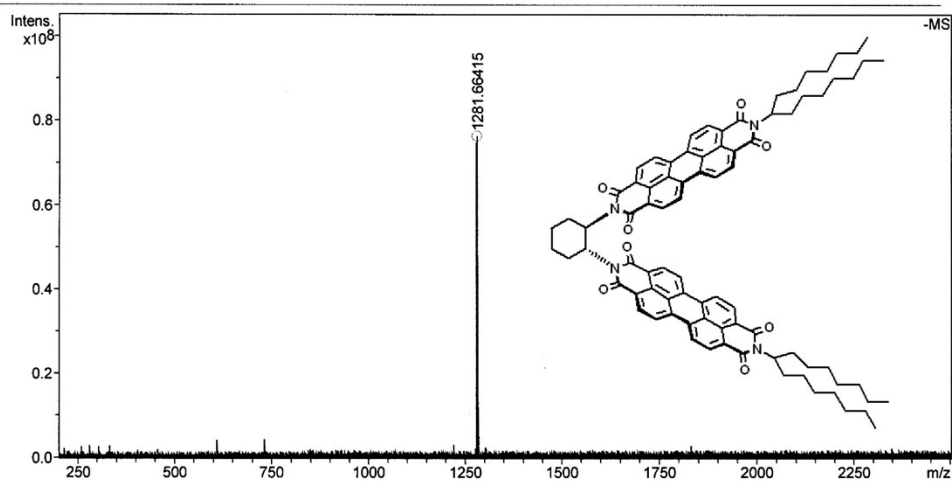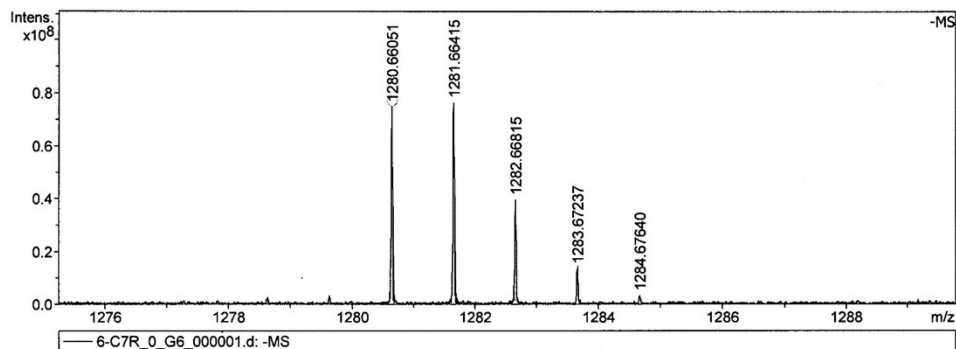

| Meas. m/z   | # | Ion Formula                                                   | Score  | m/z         | err [ppm] | Mean err [ppm] | mSigma | rdb  | e <sup>-</sup> Conf | N-Rule |
|-------------|---|---------------------------------------------------------------|--------|-------------|-----------|----------------|--------|------|---------------------|--------|
| 1280.660514 | 1 | C <sub>84</sub> H <sub>88</sub> N <sub>4</sub> O <sub>8</sub> | 100.00 | 1280.660764 | -0.2      | -0.2           | 41.6   | 43.0 | odd                 | ok     |

HRMS spectrum of **3b**.

## MALDI(N),6-C7S,20150819

|                                                           |                                       |
|-----------------------------------------------------------|---------------------------------------|
| <b>Analysis Info</b>                                      | Acquisition Date 8/19/2015 3:55:29 PM |
| Analysis Name D:\Data\MALDI\2015\0819\6-C7S_0_G7_000002.d | Operator                              |
| Method MALDI_N_100-900                                    | Instrument solariX                    |
| Sample Name                                               |                                       |
| Comment                                                   |                                       |

|                              |            |                       |                          |
|------------------------------|------------|-----------------------|--------------------------|
| <b>Acquisition Parameter</b> |            |                       |                          |
| Acquisition Mode             | Single MS  | Acquired Scans        | 5                        |
| Polarity                     | Negative   | No. of Cell Fills     | 1                        |
| Broadband Low Mass           | 202.1 m/z  | No. of Laser Shots    | 10                       |
| Broadband High Mass          | 2500.0 m/z | Laser Power           | 24.0 lp                  |
| Source Accumulation          | 0.001 sec  | Laser Shot Frequency  | 0.020 sec                |
| Ion Accumulation Time        | 0.300 sec  | Calibration Date      | Wed Aug 19 03:46:07      |
|                              |            | Data Acquisition Size | 2048576                  |
|                              |            | Data Processing Size  | 2097152                  |
|                              |            | Apodization           | Sine-Bell Multiplication |

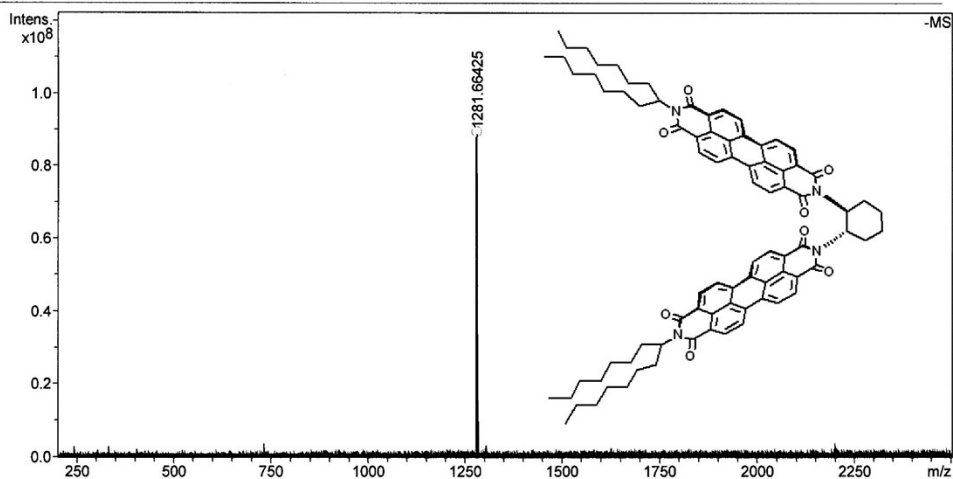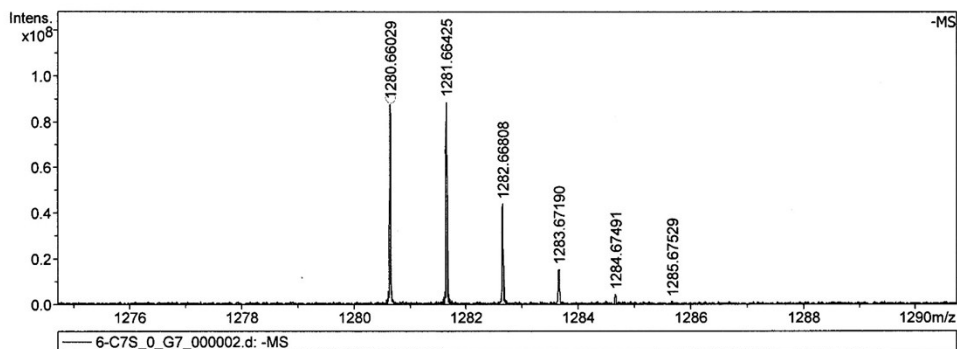

| Meas. m/z   | # | Ion Formula                                                   | Score  | m/z         | err [ppm] | Mean err [ppm] | mSigma | rdb  | e <sup>-</sup> Conf | N-Rule |
|-------------|---|---------------------------------------------------------------|--------|-------------|-----------|----------------|--------|------|---------------------|--------|
| 1280.660290 | 1 | C <sub>84</sub> H <sub>88</sub> N <sub>4</sub> O <sub>8</sub> | 100.00 | 1280.660764 | 0.4       | -0.1           | 35.1   | 43.0 | odd                 | ok     |

HRMS spectrum of **3c**.

# MALDI(N),6-C7,20150819

## Analysis Info

Analysis Name D:\Data\MALDI\2015\0819\6-C7\_0\_G5\_000003.d  
 Method MALDI\_N\_100-900  
 Sample Name  
 Comment

Acquisition Date 8/19/2015 3:50:00 PM

Operator  
 Instrument solariX

## Acquisition Parameter

|                       |            |                      |           |                       |                          |
|-----------------------|------------|----------------------|-----------|-----------------------|--------------------------|
| Acquisition Mode      | Single MS  | Acquired Scans       | 5         | Calibration Date      | Wed Aug 19 03:46:07      |
| Polarity              | Negative   | No. of Cell Fills    | 1         | Data Acquisition Size | 2048576                  |
| Broadband Low Mass    | 202.1 m/z  | No. of Laser Shots   | 10        | Data Processing Size  | 2097152                  |
| Broadband High Mass   | 2500.0 m/z | Laser Power          | 25.4 lp   | Apodization           | Sine-Bell Multiplication |
| Source Accumulation   | 0.001 sec  | Laser Shot Frequency | 0.020 sec |                       |                          |
| Ion Accumulation Time | 0.300 sec  |                      |           |                       |                          |

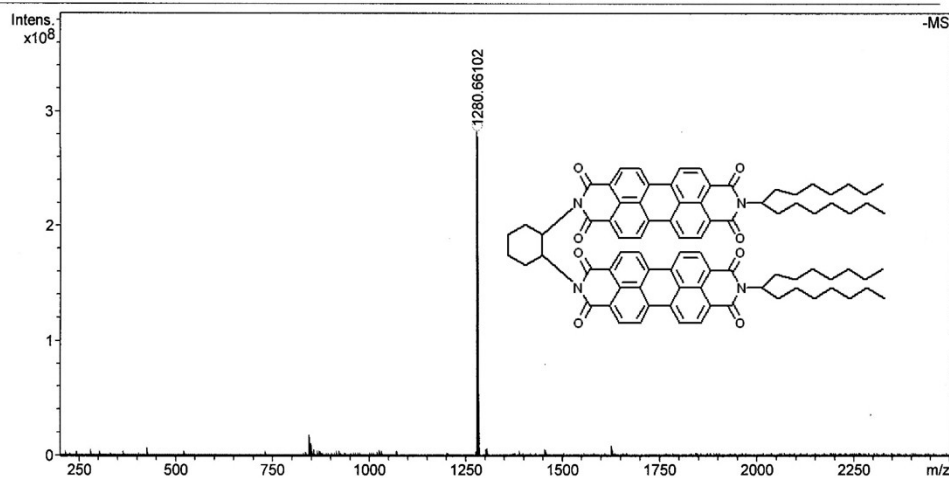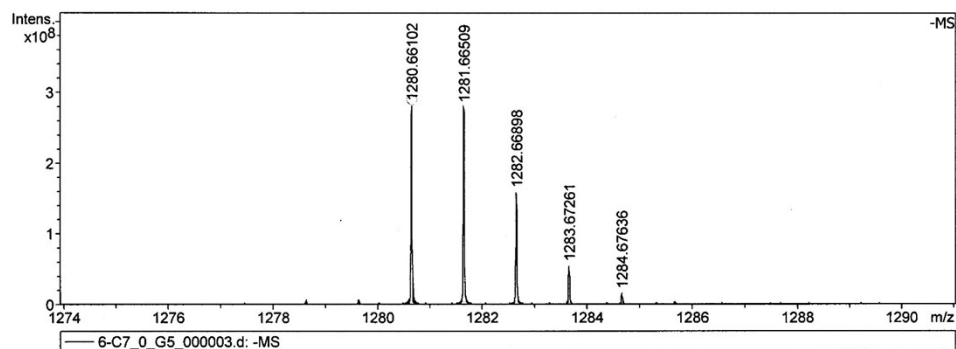

| Meas. m/z   | # | Ion Formula                                                   | Score  | m/z         | err [ppm] | Mean err [ppm] | mSigma | rdb  | e <sup>-</sup> Conf | N-Rule |
|-------------|---|---------------------------------------------------------------|--------|-------------|-----------|----------------|--------|------|---------------------|--------|
| 1280.661022 | 1 | C <sub>84</sub> H <sub>88</sub> N <sub>4</sub> O <sub>8</sub> | 100.00 | 1280.660764 | 0.2       | -0.8           | 55.8   | 43.0 | odd                 | ok     |
